# Supplementary material for: MicroRNA Expression Profiling—Potential Molecular Discrimination of Papillary Thyroid Carcinoma Subtypes
Source: MDPI journal article supplement (doi:10.3390/biomedicines12010136), 2024-01-09
Supplement: s1 [file s1]

**Table S2. Altered miRNA panel in thyroid cancer.**

| Gene           | P-value  | Log2(Fold change) | FDR(q-value) | Fold Change |
|----------------|----------|-------------------|--------------|-------------|
| hsa-mir-146b   | 1.08E-37 | 4.649519          | 1.41E-35     | 25.09832    |
| hsa-mir-551b   | 2.54E-28 | 2.926408          | 1.21E-26     | 7.602153    |
| hsa-mir-221    | 2.77E-39 | 2.783308          | 4.84E-37     | 6.884292    |
| hsa-mir-222    | 1.12E-33 | 2.415093          | 7.82E-32     | 5.33354     |
| hsa-mir-375    | 1.14E-12 | 2.289376          | 1.32E-11     | 4.888445    |
| hsa-mir-34a    | 2.43E-53 | 1.919589          | 1.27E-50     | 3.783154    |
| hsa-mir-181b-2 | 1.34E-34 | 1.532124          | 1.08E-32     | 2.892113    |
| hsa-mir-21     | 6.87E-23 | 1.413058          | 1.94E-21     | 2.66301     |
| hsa-mir-31     | 1.07E-06 | 1.355889          | 5.67E-06     | 2.559547    |
| hsa-mir-187    | 1.38E-09 | 1.308978          | 1.11E-08     | 2.477659    |
| hsa-mir-181a-2 | 6.24E-23 | 1.191311          | 1.81E-21     | 2.283602    |
| hsa-mir-181b-1 | 7.56E-28 | 1.189786          | 3.44E-26     | 2.281188    |
| hsa-mir-508    | 5.24E-09 | 1.057             | 3.83E-08     | 2.080601    |
| hsa-mir-181a-1 | 1.69E-23 | 1.013686          | 5.21E-22     | 2.019064    |
| hsa-mir-514-2  | 1.55E-09 | 0.953174          | 1.23E-08     | 1.936128    |
| hsa-mir-934    | 1.15E-10 | 0.91847           | 1.06E-09     | 1.89011     |
| hsa-mir-514-3  | 1.04E-08 | 0.887792          | 7.35E-08     | 1.850342    |
| hsa-mir-514-1  | 9.79E-09 | 0.887466          | 6.96E-08     | 1.849924    |
| hsa-mir-509-3  | 3.55E-09 | 0.868256          | 2.69E-08     | 1.825454    |
| hsa-mir-509-1  | 6.60E-10 | 0.846276          | 5.52E-09     | 1.797854    |
| hsa-mir-503    | 4.70E-06 | 0.82169           | 2.26E-05     | 1.767475    |
| hsa-mir-96     | 3.85E-10 | 0.800295          | 3.27E-09     | 1.741458    |
| hsa-mir-3065   | 1.80E-05 | 0.788426          | 8.11E-05     | 1.727188    |
| hsa-mir-509-2  | 2.58E-08 | 0.771787          | 1.72E-07     | 1.707383    |
| hsa-mir-183    | 3.74E-07 | 0.765225          | 2.08E-06     | 1.699635    |
| hsa-mir-181d   | 1.41E-08 | 0.644836          | 9.76E-08     | 1.563561    |
| hsa-mir-182    | 1.12E-05 | 0.617765          | 5.12E-05     | 1.534496    |
| hsa-mir-1274b  | 0.001276 | -0.58837          | 0.004305     | 0.665093    |
| hsa-mir-218-1  | 1.83E-08 | -0.59523          | 1.25E-07     | 0.661937    |
| hsa-mir-624    | 1.18E-17 | -0.5991           | 2.16E-16     | 0.660164    |
| hsa-mir-376c   | 3.69E-07 | -0.60372          | 2.06E-06     | 0.658053    |
| hsa-mir-34c    | 2.91E-06 | -0.60576          | 1.44E-05     | 0.657127    |
| hsa-mir-101-2  | 6.28E-11 | -0.60708          | 6.09E-10     | 0.656523    |
| hsa-mir-574    | 2.46E-15 | -0.62023          | 3.91E-14     | 0.650569    |
| hsa-mir-1291   | 7.96E-19 | -0.62085          | 1.60E-17     | 0.650288    |
| hsa-mir-153-1  | 3.98E-20 | -0.6323           | 8.86E-19     | 0.645147    |
| hsa-mir-26b    | 1.42E-13 | -0.63485          | 1.83E-12     | 0.644008    |
| hsa-mir-30c-2  | 2.82E-10 | -0.64142          | 2.45E-09     | 0.641081    |
| hsa-mir-29c    | 1.02E-10 | -0.651            | 9.61E-10     | 0.636839    |
| hsa-mir-1270-2 | 2.01E-10 | -0.65132          | 1.80E-09     | 0.636698    |

|                |          |          |          |          |
|----------------|----------|----------|----------|----------|
| hsa-mir-10b    | 4.89E-07 | -0.65644 | 2.68E-06 | 0.634443 |
| hsa-mir-582    | 1.16E-09 | -0.65652 | 9.46E-09 | 0.634407 |
| hsa-mir-369    | 1.85E-06 | -0.65846 | 9.51E-06 | 0.633552 |
| hsa-mir-382    | 8.69E-05 | -0.66448 | 0.000344 | 0.630915 |
| hsa-mir-25     | 2.99E-26 | -0.66734 | 1.20E-24 | 0.629667 |
| hsa-mir-370    | 3.61E-07 | -0.66845 | 2.03E-06 | 0.629183 |
| hsa-mir-3653   | 4.44E-09 | -0.67179 | 3.31E-08 | 0.627727 |
| hsa-mir-342    | 2.87E-09 | -0.67314 | 2.22E-08 | 0.627139 |
| hsa-mir-484    | 1.61E-12 | -0.67546 | 1.81E-11 | 0.626131 |
| hsa-let-7c     | 2.74E-12 | -0.69431 | 2.93E-11 | 0.618006 |
| hsa-mir-3676   | 2.44E-05 | -0.70332 | 0.000105 | 0.614155 |
| hsa-mir-210    | 5.53E-05 | -0.71029 | 0.000223 | 0.611199 |
| hsa-mir-126    | 5.02E-09 | -0.7106  | 3.69E-08 | 0.611067 |
| hsa-mir-584    | 2.70E-12 | -0.71138 | 2.91E-11 | 0.610737 |
| hsa-mir-3607   | 2.57E-05 | -0.71966 | 0.000109 | 0.607242 |
| hsa-mir-143    | 3.77E-07 | -0.72083 | 2.09E-06 | 0.606749 |
| hsa-mir-874    | 2.17E-06 | -0.72296 | 1.11E-05 | 0.605853 |
| hsa-mir-3912   | 1.20E-18 | -0.72383 | 2.37E-17 | 0.605488 |
| hsa-mir-1270-1 | 2.52E-12 | -0.72448 | 2.74E-11 | 0.605214 |
| hsa-mir-130a   | 6.11E-11 | -0.72555 | 5.97E-10 | 0.604767 |
| hsa-mir-16-2   | 3.40E-18 | -0.72925 | 6.47E-17 | 0.603217 |
| hsa-mir-99a    | 5.11E-16 | -0.73128 | 8.49E-15 | 0.602367 |
| hsa-mir-154    | 2.59E-09 | -0.73766 | 2.02E-08 | 0.599713 |
| hsa-mir-374b   | 5.57E-27 | -0.74707 | 2.43E-25 | 0.595814 |
| hsa-mir-148a   | 2.88E-08 | -0.74916 | 1.89E-07 | 0.594949 |
| hsa-let-7b     | 1.11E-13 | -0.75243 | 1.45E-12 | 0.593602 |
| hsa-mir-30a    | 3.30E-15 | -0.75907 | 5.15E-14 | 0.590875 |
| hsa-mir-26a-2  | 8.27E-29 | -0.7742  | 4.32E-27 | 0.584715 |
| hsa-mir-1275   | 1.28E-12 | -0.77468 | 1.47E-11 | 0.584516 |
| hsa-mir-326    | 1.53E-09 | -0.7781  | 1.22E-08 | 0.583134 |
| hsa-mir-196b   | 3.80E-07 | -0.78684 | 2.09E-06 | 0.579614 |
| hsa-mir-758    | 2.47E-06 | -0.80328 | 1.24E-05 | 0.573043 |
| hsa-mir-145    | 2.67E-10 | -0.8107  | 2.35E-09 | 0.570105 |
| hsa-mir-876    | 2.90E-31 | -0.82225 | 1.69E-29 | 0.565561 |
| hsa-mir-3652   | 8.72E-18 | -0.82572 | 1.63E-16 | 0.564199 |
| hsa-mir-425    | 2.29E-19 | -0.84561 | 4.90E-18 | 0.556476 |
| hsa-mir-3130-1 | 8.34E-09 | -0.84578 | 5.97E-08 | 0.556411 |
| hsa-mir-142    | 2.34E-05 | -0.86106 | 0.000102 | 0.550549 |
| hsa-mir-193a   | 1.20E-14 | -0.86779 | 1.74E-13 | 0.547987 |
| hsa-mir-133b   | 3.17E-09 | -0.87901 | 2.44E-08 | 0.54374  |
| hsa-mir-130b   | 1.37E-10 | -0.88062 | 1.25E-09 | 0.543134 |
| hsa-mir-215    | 4.80E-21 | -0.88629 | 1.12E-19 | 0.541005 |
| hsa-mir-10a    | 9.58E-12 | -0.8895  | 9.83E-11 | 0.539799 |
| hsa-mir-106a   | 4.99E-24 | -0.89796 | 1.74E-22 | 0.536647 |
| hsa-mir-28     | 2.31E-33 | -0.92193 | 1.42E-31 | 0.527803 |

---

|                |          |          |          |          |
|----------------|----------|----------|----------|----------|
| hsa-mir-455    | 2.05E-12 | -0.92567 | 2.28E-11 | 0.526436 |
| hsa-mir-18a    | 1.36E-22 | -0.96061 | 3.65E-21 | 0.513838 |
| hsa-mir-218-2  | 2.12E-17 | -0.97187 | 3.83E-16 | 0.509844 |
| hsa-mir-497    | 3.69E-16 | -0.9788  | 6.23E-15 | 0.507402 |
| hsa-mir-365-2  | 8.85E-23 | -0.99493 | 2.44E-21 | 0.501759 |
| hsa-mir-365-1  | 2.59E-23 | -1.0098  | 7.73E-22 | 0.496616 |
| hsa-mir-942    | 3.94E-30 | -1.0485  | 2.17E-28 | 0.483471 |
| hsa-mir-139    | 2.87E-13 | -1.05144 | 3.61E-12 | 0.482485 |
| hsa-mir-223    | 3.81E-13 | -1.06145 | 4.69E-12 | 0.47915  |
| hsa-mir-136    | 2.73E-07 | -1.06321 | 1.56E-06 | 0.478567 |
| hsa-mir-1-2    | 9.80E-10 | -1.0714  | 8.07E-09 | 0.475858 |
| hsa-mir-133a-1 | 3.05E-10 | -1.07755 | 2.64E-09 | 0.473834 |
| hsa-mir-345    | 2.41E-10 | -1.08837 | 2.13E-09 | 0.470293 |
| hsa-mir-411    | 3.91E-15 | -1.10702 | 6.02E-14 | 0.464253 |
| hsa-mir-654    | 1.26E-09 | -1.14701 | 1.02E-08 | 0.45156  |
| hsa-mir-100    | 6.20E-21 | -1.14875 | 1.41E-19 | 0.451016 |
| hsa-mir-193b   | 1.47E-16 | -1.16368 | 2.56E-15 | 0.446373 |
| hsa-mir-708    | 4.23E-12 | -1.19891 | 4.43E-11 | 0.435603 |
| hsa-mir-152    | 1.10E-21 | -1.19927 | 2.68E-20 | 0.435496 |
| hsa-mir-577    | 1.11E-12 | -1.20805 | 1.31E-11 | 0.432853 |
| hsa-mir-190    | 3.03E-22 | -1.21533 | 7.73E-21 | 0.430674 |
| hsa-mir-127    | 7.22E-07 | -1.2443  | 3.87E-06 | 0.422114 |
| hsa-mir-153-2  | 9.41E-24 | -1.30239 | 2.98E-22 | 0.405455 |
| hsa-mir-381    | 2.29E-11 | -1.30756 | 2.30E-10 | 0.404003 |
| hsa-mir-134    | 1.97E-08 | -1.31652 | 1.33E-07 | 0.401501 |
| hsa-mir-1258   | 9.96E-55 | -1.32707 | 1.04E-51 | 0.398577 |
| hsa-mir-3074   | 1.19E-26 | -1.3365  | 5.00E-25 | 0.395979 |
| hsa-mir-199a-1 | 4.50E-13 | -1.34076 | 5.47E-12 | 0.394814 |
| hsa-mir-214    | 6.20E-16 | -1.35304 | 1.01E-14 | 0.391467 |
| hsa-mir-337    | 1.02E-13 | -1.36156 | 1.35E-12 | 0.389162 |
| hsa-mir-195    | 8.75E-29 | -1.37401 | 4.36E-27 | 0.385817 |
| hsa-mir-199a-2 | 5.60E-14 | -1.39058 | 7.60E-13 | 0.381411 |
| hsa-mir-20b    | 4.71E-19 | -1.39309 | 9.66E-18 | 0.380749 |
| hsa-mir-652    | 4.31E-37 | -1.4049  | 5.01E-35 | 0.377645 |
| hsa-mir-206    | 1.97E-14 | -1.40871 | 2.78E-13 | 0.376647 |
| hsa-mir-150    | 5.93E-11 | -1.4427  | 5.85E-10 | 0.367879 |
| hsa-mir-3687   | 1.12E-34 | -1.48218 | 9.76E-33 | 0.357947 |
| hsa-mir-199b   | 9.15E-16 | -1.52493 | 1.47E-14 | 0.347497 |
| hsa-mir-363    | 2.06E-34 | -1.60649 | 1.54E-32 | 0.328396 |
| hsa-mir-138-1  | 7.81E-24 | -1.67435 | 2.64E-22 | 0.313307 |
| hsa-mir-138-2  | 8.93E-25 | -1.67623 | 3.34E-23 | 0.312898 |
| hsa-mir-675    | 2.24E-18 | -1.68093 | 4.35E-17 | 0.311881 |
| hsa-mir-873    | 1.83E-38 | -1.70656 | 2.74E-36 | 0.306389 |
| hsa-mir-7-3    | 2.27E-21 | -1.7616  | 5.39E-20 | 0.29492  |
| hsa-mir-379    | 8.89E-13 | -1.79098 | 1.06E-11 | 0.288976 |

---

|              |          |          |          |          |
|--------------|----------|----------|----------|----------|
| hsa-mir-9-2  | 1.26E-35 | -2.33389 | 1.20E-33 | 0.198348 |
| hsa-mir-9-1  | 5.73E-36 | -2.35075 | 5.99E-34 | 0.196044 |
| hsa-mir-1247 | 1.50E-19 | -2.39288 | 3.26E-18 | 0.190402 |
| hsa-mir-7-2  | 8.58E-24 | -2.50782 | 2.80E-22 | 0.17582  |
| hsa-mir-1179 | 1.32E-33 | -2.53595 | 8.62E-32 | 0.172426 |
| hsa-mir-144  | 1.35E-42 | -2.60976 | 4.70E-40 | 0.163826 |
| hsa-mir-451  | 4.69E-40 | -2.64883 | 9.81E-38 | 0.159449 |
| hsa-mir-486  | 1.46E-41 | -2.69182 | 3.83E-39 | 0.154769 |
| hsa-mir-204  | 1.39E-22 | -2.86871 | 3.63E-21 | 0.136909 |

---
